# Supplementary material for: Modelling the COVID-19 epidemic and implementation of population-wide interventions in Italy
Source: Springer Nature journal article supplement (doi:10.1038/s41591-020-0883-7), 2020-04-22
Supplement: 41591_2020_883_MOESM1_ESM.pdf [file 41591_2020_883_MOESM1_ESM.pdf]

In the format provided by the authors and unedited.

# Modelling the COVID-19 epidemic and implementation of population-wide interventions in Italy

Giulia Giordano<sup>1</sup>✉, Franco Blanchini<sup>2</sup>, Raffaele Bruno<sup>3,4</sup>, Patrizio Colaneri<sup>5,6</sup>, Alessandro Di Filippo<sup>3</sup>, Angela Di Matteo<sup>3</sup> and Marta Colaneri<sup>3</sup>

---

<sup>1</sup>Department of Industrial Engineering, University of Trento, Trento, Italy. <sup>2</sup>Dipartimento di Scienze Matematiche, Informatiche e Fisiche, University of Udine, Udine, Italy. <sup>3</sup>Division of Infectious Diseases I, Fondazione IRCCS Policlinico San Matteo, Pavia, Italy. <sup>4</sup>Department of Clinical, Surgical, Diagnostic, and Paediatric Sciences, University of Pavia, Pavia, Italy. <sup>5</sup>Dipartimento di Elettronica, Informazione e Bioingegneria, Politecnico di Milano, Milano, Italy. <sup>6</sup>IEIT-CNR, Milano, Italy. ✉e-mail: [giulia.giordano@unitn.it](mailto:giulia.giordano@unitn.it)

|    |           |                  |        |           |          |       | Positive of which |      |         |
|----|-----------|------------------|--------|-----------|----------|-------|-------------------|------|---------|
|    | Day       | Cumulative cases | Deaths | Recovered | Positive | CFR   | Hospitalised      | ICU  | At home |
| *  | 20-feb-20 | 3                | 0      | 0         | 3        | 0,000 | NA                | NA   | NA      |
| *  | 21-feb-20 | 20               | 1      | 0         | 19       | 0,050 | NA                | NA   | NA      |
| *  | 22-feb-20 | 79               | 2      | 0         | 77       | 0,025 | NA                | NA   | NA      |
| PC | 23-feb-20 | 132              | 2      | 1         | 129      | 0,015 | 54                | 26   | 49      |
| PC | 24-feb-20 | 219              | 5      | 1         | 213      | 0,023 | 99                | 23   | 91      |
| PC | 25-feb-20 | 322              | 10     | 1         | 311      | 0,031 | 114               | 35   | 162     |
| PC | 26-feb-20 | 400              | 12     | 3         | 385      | 0,030 | 128               | 36   | 221     |
| PC | 27-feb-20 | 650              | 17     | 45        | 588      | 0,026 | 248               | 56   | 284     |
| PC | 28-feb-20 | 888              | 21     | 46        | 821      | 0,024 | 345               | 64   | 412     |
| PC | 29-feb-20 | 1128             | 29     | 50        | 1049     | 0,026 | 401               | 105  | 543     |
| PC | 01-mar-20 | 1694             | 34     | 83        | 1577     | 0,020 | 639               | 140  | 798     |
| PC | 02-mar-20 | 2036             | 52     | 149       | 1835     | 0,026 | 742               | 166  | 927     |
| PC | 03-mar-20 | 2502             | 79     | 160       | 2263     | 0,032 | 1034              | 229  | 1000    |
| PC | 04-mar-20 | 3089             | 107    | 276       | 2706     | 0,035 | 1346              | 295  | 1065    |
| PC | 05-mar-20 | 3858             | 148    | 414       | 3296     | 0,038 | 1790              | 351  | 1155    |
| PC | 06-mar-20 | 4636             | 197    | 523       | 3916     | 0,042 | 2394              | 462  | 1060    |
| PC | 07-mar-20 | 5883             | 233    | 589       | 5061     | 0,040 | 2651              | 567  | 1843    |
| PC | 08-mar-20 | 7375             | 366    | 622       | 6387     | 0,050 | 3557              | 650  | 2180    |
| PC | 09-mar-20 | 9172             | 463    | 724       | 7985     | 0,050 | 4316              | 733  | 2936    |
| PC | 10-mar-20 | 10149            | 631    | 1004      | 8514     | 0,062 | 5038              | 877  | 2599    |
| PC | 11-mar-20 | 12462            | 827    | 1045      | 10590    | 0,066 | 5838              | 1028 | 3724    |
| PC | 12-mar-20 | 15113            | 1016   | 1258      | 12839    | 0,067 | 6650              | 1153 | 5036    |
| PC | 13-mar-20 | 17660            | 1266   | 1439      | 14955    | 0,072 | 7426              | 1328 | 6201    |
| PC | 14-mar-20 | 21157            | 1441   | 1966      | 17750    | 0,068 | 8372              | 1518 | 7860    |
| PC | 15-mar-20 | 24747            | 1809   | 2335      | 20603    | 0,073 | 9663              | 1672 | 9268    |
| PC | 16-mar-20 | 27980            | 2158   | 2749      | 23073    | 0,077 | 11025             | 1851 | 10197   |
| PC | 17-mar-20 | 31506            | 2503   | 2941      | 26062    | 0,079 | 12894             | 2060 | 11108   |
| PC | 18-mar-20 | 35713            | 2978   | 4025      | 28710    | 0,083 | 14363             | 2257 | 12090   |
| PC | 19-mar-20 | 41035            | 3405   | 4440      | 33190    | 0,083 | 15757             | 2498 | 14935   |
| PC | 20-mar-20 | 47021            | 4032   | 5129      | 37860    | 0,086 | 16020             | 2655 | 19185   |
| PC | 21-mar-20 | 53578            | 4825   | 6072      | 42681    | 0,090 | 17708             | 2857 | 22116   |
| PC | 22-mar-20 | 59138            | 5476   | 7024      | 46638    | 0,093 | 19846             | 3009 | 23783   |
| PC | 23-mar-20 | 63927            | 6077   | 7432      | 50418    | 0,095 | 20692             | 3204 | 26522   |
| PC | 24-mar-20 | 69176            | 6820   | 8326      | 54030    | 0,099 | 21937             | 3396 | 28697   |
| PC | 25-mar-20 | 74386            | 7503   | 9362      | 57521    | 0,101 | 23112             | 3489 | 30920   |
| PC | 26-mar-20 | 80539            | 8165   | 10361     | 62013    | 0,101 | 24753             | 3612 | 33648   |
| PC | 27-mar-20 | 86498            | 9134   | 10950     | 66414    | 0,106 | 26029             | 3732 | 36653   |
| PC | 28-mar-20 | 92472            | 10023  | 12384     | 70065    | 0,108 | 26676             | 3856 | 39533   |
| PC | 29-mar-20 | 97689            | 10779  | 13030     | 73880    | 0,110 | 27386             | 3906 | 42588   |
| PC | 30-mar-20 | 101739           | 11591  | 14620     | 75528    | 0,114 | 27795             | 3981 | 43752   |
| PC | 31-mar-20 | 105792           | 12428  | 15729     | 77635    | 0,117 | 28192             | 4023 | 45420   |
| PC | 01-apr-20 | 110574           | 13155  | 16847     | 80572    | 0,119 | 28403             | 4035 | 48134   |
| PC | 02-apr-20 | 115242           | 13915  | 18278     | 83049    | 0,121 | 28540             | 4053 | 50456   |
| PC | 03-apr-20 | 119827           | 14681  | 19758     | 85388    | 0,123 | 28741             | 4068 | 52579   |
| PC | 04-apr-20 | 124632           | 15362  | 20996     | 88274    | 0,123 | 29010             | 3994 | 55270   |
| PC | 05-apr-20 | 128948           | 15887  | 21815     | 91246    | 0,123 | 28949             | 3977 | 58320   |

\* Source: Unofficial data (newspapers, press, statements etc)

PC Source: Official data "Ministero della Salute" and "Protezione Civile"
